## **Hydrogen sulfide exposure reduces thermal set point in zebrafish**

Dimitri A. Skandalis, Cheryl D. Dobell, Joshua C. Shaw, Glenn J. Tattersall\*

Department of Biological Sciences, Brock University, St. Catharines, ON, Canada L2S 3A1

\* Correspondence to:

Glenn J. Tattersall,

500 Glenridge Avenue,

Department of Biological Sciences,

Brock University,

St. Catharines, ON, Canada,

L2S 3A1

### **Author contributions:**

JCS and GJT designed the shuttlebox; CDD, JCS, and GJT designed experiments; CDD and JCS performed experiments; DAS analysed results and prepared figures; DAS, CDD, and GJT wrote the manuscript; DAS and GJT approved the manuscript in its final form.

### **Abbreviated Title:**

Behavioural anapyrexia in zebrafish

Keywords: thermal preference, set point, thermoregulation

#### 4 **Abstract**

5           Behavioural flexibility allows ectotherms to exploit the environment to govern their  
6 metabolic physiology, including in response to environmental stress. Hydrogen sulfide (H<sub>2</sub>S) is a  
7 widespread environmental toxin that can lethally inhibit metabolism. However, H<sub>2</sub>S can also  
8 alter behaviour and physiology, including a hypothesised induction of hibernation-like states  
9 characterised by downward shifts of the innate thermal setpoint (anapyrexia). Support for this  
10 hypothesis has proved controversial because it is difficult to isolate active and passive  
11 components of thermoregulation, especially in animals with high resting metabolic heat  
12 production. Here, we directly test this hypothesis by leveraging the natural behavioural  
13 thermoregulatory drive of fish to move between environments of different temperatures in  
14 accordance with their current physiological state and thermal preference. We observed a  
15 decrease in adult zebrafish (*Danio rerio*) preferred body temperature with exposure to 0.02%  
16 H<sub>2</sub>S, which we interpret as a shift in thermal setpoint. Individuals exhibited consistent  
17 differences in shuttling behaviour and preferred temperatures, which were reduced by a constant  
18 temperature magnitude during H<sub>2</sub>S exposure. Seeking lower temperatures alleviated H<sub>2</sub>S-induced  
19 metabolic stress, as measured by reduced rates of aquatic surface respiration rate. Our findings  
20 highlight the interactions between individual variation and sublethal impacts of environmental  
21 toxins on behaviour.

## 22 **Introduction**

23 Environmental toxicants may act through myriad pathways, including hijacking the  
24 body's own signalling pathways. Hydrogen sulfide (H<sub>2</sub>S) is a widespread aquatic toxicant that is  
25 also an important endogenous gasotransmitter, and occurs naturally through anoxic  
26 decomposition (e.g., salt marshes and mangrove swamps) or due to anthropogenic activities (e.g.,  
27 sewage treatment and aquaculture farming, [1,2]). Exogenous H<sub>2</sub>S inhibits aerobic respiration  
28 and, together with low oxygen (hypoxia), contributes to large fish kills [1–3]. However,  
29 endogenous H<sub>2</sub>S is involved in the response to hypoxia and has physiological regulatory roles in  
30 synaptic activity and cognitive function, and inflammation [4–6]. Environmental H<sub>2</sub>S could  
31 therefore induce potent physiological responses independently of metabolic distress. For  
32 instance, it has been proposed that application of exogenous H<sub>2</sub>S in combination with low  
33 temperatures induces a drop in body temperature through entry into a hypometabolic  
34 hibernation-like state in mice [7]. However, it is unclear if this is an effect of H<sub>2</sub>S alone or  
35 aggravation of a conserved environmental hypoxia response [8,9]. These studies have been  
36 performed in small mammals with their thermoneutral zone, where thermogenesis and  
37 dissipation are normally balanced; metabolic poisoning by exogenous H<sub>2</sub>S might impair resting  
38 heat production rather than stimulate a controlled depression of the set point. In contrast, the  
39 thermal setpoint of ectotherms like fish is regulated behaviourally, enabling direct assessment of  
40 body temperature regulation. Whereas in most terrestrial animals exogenous H<sub>2</sub>S is applied to  
41 study the gasotransmitter's endogenous functions [7,8], in aquatic habitats exogenous H<sub>2</sub>S is also  
42 ecologically relevant [10–13]. We exploit this physiology as a direct test of the hypothesis that  
43 H<sub>2</sub>S drives changes in thermal preferences, which is significant for the ecology and behaviour of  
44 this major taxon.

45 Fish select environments based on their preferred temperatures and behavioural  
46 motivation. Active fish, like zebrafish (*Danio rerio*), tend to move toward their preferred  
47 temperatures, whereas benthic or sedentary species tend to remain in place until extreme  
48 temperatures become unbearable [14]. Fish can detect water temperature changes of 0.05°C or  
49 less [15]. Preferred temperatures vary within and among individuals, depending on factors such  
50 as growth, acclimation, health, and social cues [16–22]. Preferred temperature reflects the fish's  
51 metabolic state [17], and numerous fish select colder temperatures (i.e., behavioural anapyrexia)  
52 in hypoxia than in normoxia conditions [23–25]. Presumably, the response is due to enhanced

53 haemoglobin oxygen-binding capacity and reduced metabolic demand of tissue at low  
54 temperatures, which balance oxygen supply and demand [23]. Exposure of fish to H<sub>2</sub>S shares  
55 many physiological similarities with hypoxia [1,25], which could arise because H<sub>2</sub>S metabolism  
56 functions as an endogenous O<sub>2</sub> sensor [13,25]. Here, we examine how zebrafish thermal  
57 preferences are altered with exposure to H<sub>2</sub>S in normoxic conditions. We hypothesized that H<sub>2</sub>S  
58 would trigger a reduction in individual thermal setpoint, which would suggest that sublethal H<sub>2</sub>S  
59 can also have major effects on physiology and behaviour.

60

## 61 **Materials and Methods**

### 62 *Animals and husbandry*

63 Zebrafish (*Danio rerio*) from a local supplier were housed in 40L aquarium tanks at 27°C  
64 and pH 7.6-7.8 (Seachem™ Acid Buffer), on a 12:12 light:dark cycle with once-daily feedings  
65 (Tetra Flakes™). Fish were housed at least 24 days and habituated to walls lined with white  
66 contact paper prior to experiments.

67

### 68 *Shuttlebox design and gas mixing*

69 Thermal preferences were tested in a two-chamber dynamic shuttlebox described  
70 previously [26] by automatically tracking body position (x,y; x=0 at midline, +x to the right),  
71 swim velocity, and chamber temperatures; each variable was sampled at 1 Hz and stored for  
72 offline analysis by the program ICFish (v.2.1, Brock University Electronics; see [26]). Hydrogen  
73 sulfide was bubbled through inaccessible side chambers into the main chamber, allowing gas  
74 mixing without disturbing the fish. Air and 0.2% H<sub>2</sub>S were mixed to achieve the appropriate H<sub>2</sub>S  
75 concentration (0% or 0.02% H<sub>2</sub>S) by flow meters (Omega rotameters) at 5000 mL min<sup>-1</sup>. We  
76 found 0.02% H<sub>2</sub>S elicited robust responses without severe distress found at 0.07% H<sub>2</sub>S (not  
77 shown). Bubbling mixed gases avoids difficulties in determining H<sub>2</sub>S concentration from  
78 dissolved NaS salts [5,25], and balancing H<sub>2</sub>S with air (rather than nitrogen) guarantees  
79 normoxia (20.88% O<sub>2</sub>). Gas dissolution equilibrated for 30 minutes. Gas was also flowed under a  
80 clear Plexiglas cover to maintain constant chamber gas pressures, minimise condensation, and  
81 preclude gas gradients within the chamber (e.g., lower H<sub>2</sub>S at the water surface).

82

### 83 *Respiratory drive in response to H<sub>2</sub>S*

84           Respiratory responses were assessed in two fish at a time at a constant temperature, each  
85 placed in one side of the shuttlebox and separated by an opaque barrier. Six individuals were  
86 exposed to each combination of 0 or 0.02% H<sub>2</sub>S and 21 or 28°C and two individuals to 0% H<sub>2</sub>S  
87 at 28°C, for 60 min. Body position in the water column was sampled at 1 Hz from a horizontal  
88 view, and frames with fish at the surface (successes) out of the total number of frames (trials)  
89 were interpreted as the aquatic surface respiration rate ([24], analyzed in ImageJ v1.52). The  
90 effects of H<sub>2</sub>S and temperature were modeled with a binomial error distribution using Markov  
91 chain Monte Carlo (*brms* [27]) with four chains of 10,000 iterations each, run to convergence ( $\hat{R}$   
92 = 1 [28]), discarding half as burn-in. Significance was interpreted as posterior parameter credible  
93 intervals excluding zero.

94

### 95 *Shuttling experiments*

96           Pilot experiments revealed the most robust thermoregulatory behaviour when fish could  
97 first learn to associate each chamber with a constant temperature difference. Therefore, fish were  
98 introduced to the left chamber (Figure 1, set to 1.5°C below housing temperature) and habituated  
99 one hour with a constant 3°C difference between chambers. Ramping then commenced for two  
100 hours, triggered when the fish entered the left (cooling, -0.5°C min<sup>-1</sup>) or right (warming, +0.5°C  
101 min<sup>-1</sup>) sides, within limits set to 15 and 35°C (within 5°C of *D. rerio*'s thermal tolerances [19]).  
102 Following gas equilibration for 30 minutes, behaviour was recorded for four hours (test phase).  
103 Fish that exhibited severe distress (e.g., loss of equilibrium) were pre-emptively removed from  
104 the experiment.

105

### 106 *Data collection*

107           Fish  $x$  position was used to calculate shuttling rate (frequency of crossing  $x=0$ , min<sup>-1</sup>) and  
108 side preference  $2 \cdot (0.5 - \text{Time}_{x<0} / \text{Time}_{\text{total}})$ . Thermal inertia of small fish is minimal compared to  
109 water temperature [18,29,30], so we calculated body temperature ( $T_B$ ) by averaging current  
110 chamber temperature with  $T_B$  in the previous time step. Lower and upper escape temperatures  
111 (LET and UET) were the last recorded  $T_B$  prior to a shuttle.

112           Qualitative differences of side preference were visualised through two-dimensional  
113 kernel density estimates with a bandwidth of 50 x 50 pixels, unconstrained by shuttlebox

114 boundaries. For visualisation, the shuttlebox walls were estimated *post hoc* from fish positions,  
115 and the resulting densities clipped to those borders. We applied generalised additive models (R  
116 package *mgcv* [31]) to model the differences in average  $T_B$  over time between 0% (reference  
117 spline) and 0.02% (difference spline)  $H_2S$ . Serial autocorrelation of time series model errors was  
118 incorporated through a Gaussian process spline basis with AR(1) autocorrelation structure. All  
119 other variables were quantitatively analysed through linear models. Fish velocity and shuttling  
120 rate were log-transformed prior to analysis. To quantify individual variation in responses to  $H_2S$ ,  
121 we assessed the relationships of responses during the ramping phase to those during the testing  
122 phase. This approach is predicated on the consistency of intra-individual thermal preferences  
123 over the course of the experiment, which we justify by calculating repeatabilities (*rptR* [32]) of  
124 thermal preferences and behaviour between the ramping and testing phases, within the 0%  $H_2S$   
125 group. We report confidence intervals of effect sizes and associated *p*-values (two-tailed,  
126  $\alpha=0.05$ ), with full model summaries included in Supplementary Materials.

127

## 128 **Results**

129 Aquatic surface respiration (ASR) rate in response to exogenous  $H_2S$  was quantified by  
130 time spent at the surface at 21 and 28°C. The probability of surface respiration greatly increased  
131 with  $H_2S$  level (Figure 1; Credible Intervals, CrI: 1.41–4.36) as well as with higher temperatures  
132 (CrI: 0.11–2.43). Our experimental design precluded hypoxia or  $H_2S$  gradients; this suggests that  
133 ASR was driven by a reflexive respiratory drive rather than detection of reduced  $H_2S$  near the  
134 surface. Because the respiratory response was reduced at lower temperatures, we examined  
135 whether fish would seek lower temperatures when challenged with  $H_2S$ . Fish learned to control  
136 water temperature by swimming between the left (cold) or right (warm) chambers of the  
137 shuttlebox (e.g., highlighted individual traces in Figure 1B). Fish only exhibited overall side  
138 preferences with exogenous  $H_2S$  (Figure 1 Bi, Ci; side preference in 0%  $H_2S$  Confidence  
139 Interval, CI: -0.18–0.06; in 0.02%  $H_2S$  CI: 0.21–0.48). Upon  $H_2S$  exposure, fish rapidly selected  
140 reduced  $T_B$  (Figure 1 B ii, C ii;  $p<0.001$ ;  $\Delta T_B$  CI: 3.6–8.4°C), and exhibited reduced lower  
141 ( $p=0.002$ ;  $\Delta LET$  CI: 1.6–6.1) and upper ( $p=0.001$ ;  $\Delta UET$  CI: 1.7–6.7) escape temperatures.

142 Several fish entered the cold side and stopped shuttling altogether (Figure 1 Bii), which  
143 could mean that metabolic stress drives fish to escape and become trapped on the cold side.  
144 However, shuttling rates did not differ overall ( $p=0.60$ ; CI: -0.23–0.40  $min^{-1}$ ), and in fact swim

145 velocity markedly increased after the introduction of gas (Figure 1 Ciii), which was sustained in  
146 the testing phase ( $p=0.007$ ; CI: 0.21-0.68 cm s<sup>-1</sup>). Rather, side selection was dependent on  
147 variation in individual temperature preference (Figure 1 Di), despite acclimation together at 27°C  
148 for longer than a typical period of 10-12 days (e.g., [19,20]). The consistency of preferred  $T_B$   
149 over the experiment duration in 0% H<sub>2</sub>S (e.g., individual and average traces, Figure 1 B)  
150 suggested to us that average  $T_B$  during the ramping phase could be used to gauge how  
151 temperatures are selected in the testing phase (Figure 1 B). In 0% H<sub>2</sub>S, a constant preferred  
152 temperature is indicated by a regression slope overlapping unity (Figure 1 D ii; slope 0.88, CI:  
153 0.24–1.53) and reasonably high repeatability ( $R=0.54$ , CI: 0.13-0.78,  $p=0.006$ ). The high  
154 correlation and conserved preference might be surprising given that fish are learning the  
155 paradigm during the ramping phase. The effect of learning instead appears to be in the shuttling  
156 rate, which is similarly repeatable (Figure 1 D iii, *log* shuttle rate  $R=0.51$ , CI: 0.08-0.77,  $p=0.01$ )  
157 but with slope less than unity (CI: 0.38-0.98; no significant effect of treatment, H<sub>2</sub>S  $p=0.85$ ; *log*  
158 shuttle rate  $\times$  H<sub>2</sub>S:  $p=0.37$ ). The low slope suggests that fish finetune behaviour to maintain  
159 preferred  $T_B$  with less effort. Given the repeatable  $T_B$ , we examined how H<sub>2</sub>S exposure alters the  
160 thermal setpoint. If H<sub>2</sub>S causes a reduction in a fish's innate  $T_B$  set point, we would expect to see  
161 an intercept difference alone between the ramping and test  $T_B$  relationship. Conversely, if H<sub>2</sub>S  
162 causes severe distress and an escape response so that fish try to achieve the lowest possible  
163 temperature regardless of their innate  $T_B$  set point, we would expect to observe a significant  $T_B$   
164  $\times$  H<sub>2</sub>S interaction. The intercept shift was not accompanied by an interaction (Figure 1 D ii;  
165  $p<0.001$ ; CI  $\Delta T_B$ : 4.1–8.3°C;  $T_B \times$  H<sub>2</sub>S:  $p=0.61$ ), pointing to a reduction of  $T_B$  set point.

166

## 167 Discussion

168 A central question in thermoregulatory physiology is the nature of the thermal setpoint  
169 and how it is adjusted [14,17]. Behavioural thermoregulation enables exploitation of the  
170 environment to select body temperatures that reflect the animal's internal state. We found that  
171 individual adult zebrafish have temperature preferenda spanning at least 10°C (Figure 1),  
172 possibly due to factors such as juvenile growth conditions and standard metabolic rate [17] or  
173 health and age [20] (though no individuals were obviously ill, as judged by condition and robust  
174 escape response before testing). In response to the prevalent aquatic stressor H<sub>2</sub>S, fish  
175 temperature preference was reduced by a constant ~6°C though relative differences in preferenda

176 were maintained (Figure 1 D ii). The preferences for lower temperatures with H<sub>2</sub>S exposure  
177 occurred despite higher overall activity (swim speed) but constant shuttling frequencies, which  
178 points to active defense of a new mean (e.g., exemplary individuals in Figure 1 B). Taken  
179 together, these observations point to a shift in innate thermal setpoint, similar to the widely  
180 conserved anapyrexia response observed in hypoxia [9,23,33]. In preliminary experiments  
181 testing the shuttlebox design, we examined thermoregulatory behaviour to 2% O<sub>2</sub> which reliably  
182 elicits hypoxic responses [24]. In hypoxia, the change in body temperature was about half that  
183 observed with H<sub>2</sub>S (one-tailed *t*-test with unequal variances,  $t_{11,4}=2.01$ ,  $p=0.03$ ,  $\Delta T_B \sim -3.2^\circ\text{C}$ ),  
184 whereas swim speed decreased rather than increased ( $t_{13,9}=1.85$ ,  $p=0.04$ ,  $\Delta \text{speed} \sim 0.90$ ; see also  
185 [24]). The blunter response to hypoxia alone is consistent with the emerging view that H<sub>2</sub>S is a  
186 key effector of the hypoxia response [4,25,34]. An important cellular candidate for responses to  
187 low oxygen are fishes' neuroepithelial cells (NECs, [24]), which also contain H<sub>2</sub>S-producing  
188 enzymes [25]. Exogenous H<sub>2</sub>S greatly increases ventilatory rates and accentuates physiological  
189 responses to hypoxia [8], and partially rescues hypoxic ventilatory responses when NECs are  
190 inhibited [25]. Whether exogenous H<sub>2</sub>S is also sufficient to activate anapyrexia in terrestrial  
191 animals without some hypoxia is less clear [7,8], but it is promising that physiological  
192 similarities of mammalian carotid bodies and NECs include their responses to H<sub>2</sub>S [9,13,25]. A  
193 better understanding of the cellular mechanisms underlying behavioural responses in fish can  
194 therefore shed light more widely on the role and utility of H<sub>2</sub>S in functions such as artificial  
195 hibernation [7].

196 Hydrogen sulfide drives fish to seek alternative environments when possible, including  
197 through emersion [1,10] or refuge in habitats such as estuaries [3]. We found that fish also seek  
198 colder temperatures when exposed to H<sub>2</sub>S. The aquatic surface respiration rate was somewhat  
199 reduced when fish were held at 21°C rather than 28°C, temperatures that roughly coincide with  
200 the average thermal preference in each group (mean  $T_B$  0% H<sub>2</sub>S: 27.3°C, 0.02% H<sub>2</sub>S: 21.3°C).  
201 We propose that environmental H<sub>2</sub>S can impact daily and seasonal habitat selection [1,20] by  
202 driving fish to cooler waters, which may contribute to intraspecific segregation and selection  
203 during repeated colonisations of H<sub>2</sub>S-replete habitats [10,12]. An important consideration is the  
204 value fish place in maintaining a habitat or defending a territory [21,22,26]: fish with higher  
205 temperature preference might be more resistant overall and less likely to abandon a current  
206 habitat in favour of searching for alternative environments. Whether this is ultimately



207 advantageous will depend on the degree of environmental H<sub>2</sub>S and the combination of direct  
208 physiological and indirect impacts on microfauna and flora [3] that affect habitat suitability.  
209 Moreover, searching for cold refugia might in some cases be maladaptive because low  
210 temperatures can drive redox reactions that release H<sub>2</sub>S from mud [35]. Overall, we find that the  
211 capacity of H<sub>2</sub>S to alter behavioural thermal preferences in the absence of hypoxia [8] can  
212 contribute to its already complex environmental effects [1,3]. The potency of this effect appears  
213 to be due to its critical role in sensing and responding to oxygen levels, demonstrating that  
214 environmental hijacking of an endogenous gasotransmitter can profoundly affect animal  
215 behaviour.

216

### 217 **Acknowledgements**

218 We are especially grateful to Brock University's Technical Services team for building the  
219 electronic shuttle box, and Viviana Cadena, Jacob Berman, and Qian Long for assistance with  
220 experiments, and to Miriam Richards for guidance with the behavioural assessment. This  
221 research was funded by Natural Sciences and Engineering Research Council of Canada  
222 (NSERC) Discovery Grants RGPIN-2014-05814 to GJT.

223

### 224 **Data availability**

225 Data are available from the Dryad Digital Repository at: #####

## 226 Literature Cited

- 227 1. Bagarinao T. 1992 Sulfide as an environmental factor and toxicant: tolerance and adaptations  
228 in aquatic organisms. *Aquatic Toxicology* **24**, 21–62. (doi:10.1016/0166-445X(92)90015-F)
- 229 2. Bagarinao T, Lantin-Olaguer I. 1998 The sulfide tolerance of milkfish and tilapia in relation  
230 to fish kills in farms and natural waters in the Philippines. *Hydrobiologia* **382**, 137–150.  
231 (doi:10.1023/A:1003420312764)
- 232 3. Lamberth SJ, Branch GM, Clark BM. 2010 Estuarine refugia and fish responses to a large  
233 anoxic, hydrogen sulphide, “black tide” event in the adjacent marine environment. *Estuarine,  
234 Coastal and Shelf Science* **86**, 203–215. (doi:10.1016/j.ecss.2009.11.016)
- 235 4. Kimura H. 2002 Hydrogen Sulfide as a Neuromodulator. *Molecular Neurobiology* **26**, 013–  
236 020. (doi:10.1385/MN:26:1:013)
- 237 5. Olson KR. 2013 Hydrogen sulfide: both feet on the gas and none on the brake? *Front  
238 Physiol* **4**. (doi:10.3389/fphys.2013.00002)
- 239 6. Wu B, Teng H, Zhang L, Li H, Li J, Wang L, Li H. 2015 Interaction of Hydrogen Sulfide  
240 with Oxygen Sensing under Hypoxia. *Oxid Med Cell Longev* **2015**.  
241 (doi:10.1155/2015/758678)
- 242 7. Blackstone E, Morrison M, Roth MB. 2005 H<sub>2</sub>S Induces a Suspended Animation-Like State  
243 in Mice. *Science* **308**, 518–518. (doi:10.1126/science.1108581)
- 244 8. Hemelrijk SD, Dirkes MC, van Velzen MHN, Bezemer R, van Gulik TM, Heger M. 2018  
245 Exogenous hydrogen sulfide gas does not induce hypothermia in normoxic mice. *Sci Rep* **8**,  
246 3855. (doi:10.1038/s41598-018-21729-8)
- 247 9. Steiner AA, Branco LGS. 2002 Hypoxia-Induced Anapyrexia: Implications and Putative  
248 Mediators. *Annu. Rev. Physiol.* **64**, 263–288.  
249 (doi:10.1146/annurev.physiol.64.081501.155856)
- 250 10. Cochrane PV, Rossi GS, Tunnah L, Jonz MG, Wright PA. 2019 Hydrogen sulphide toxicity  
251 and the importance of amphibious behaviour in a mangrove fish inhabiting sulphide-rich  
252 habitats. *J Comp Physiol B* **189**, 223–235. (doi:10.1007/s00360-019-01204-0)
- 253 11. Jensen B, Pardue S, Kevil CG, Fago A. 2019 Tissue-dependent variation of hydrogen sulfide  
254 homeostasis in anoxic freshwater turtles. *Journal of Experimental Biology* **222**.  
255 (doi:10.1242/jeb.203976)
- 256 12. Bagarinao T, Vetter RD. 1989 Sulfide tolerance and detoxification in shallow-water marine  
257 fishes. *Mar. Biol.* **103**, 291–302. (doi:10.1007/BF00397262)
- 258 13. Olson KR *et al.* 2008 Hydrogen sulfide as an oxygen sensor in trout gill chemoreceptors.  
259 *American Journal of Physiology-Regulatory, Integrative and Comparative Physiology* **295**,  
260 R669–R680. (doi:10.1152/ajpregu.00807.2007)

- 261 14. Reynolds WW. 1977 Temperature as a Proximate Factor in Orientation Behavior. *J. Fish.*  
262 *Res. Bd. Can.* **34**, 734–739. (doi:10.1139/f77-114)
- 263 15. Bardach JE, Bjorklund RG. 1957 The Temperature Sensitivity of Some American  
264 Freshwater Fishes. *The American Naturalist* **91**, 233–251. (doi:10.1086/281982)
- 265 16. Müller R. 1977 Temperature selection of goldfish (*carassius auratus* L.) and brook trout  
266 (*Salvelinus fontinalis* mitch.) After heterogeneous temperature acclimation. *Journal of*  
267 *Thermal Biology* **2**, 5–7. (doi:10.1016/0306-4565(77)90003-1)
- 268 17. Killen SS. 2014 Growth trajectory influences temperature preference in fish through an  
269 effect on metabolic rate. *Journal of Animal Ecology* **83**, 1513–1522. (doi:10.1111/1365-  
270 2656.12244)
- 271 18. Reynolds WW, Casterlin ME. 1979 Behavioral Thermoregulation and the “Final  
272 Preferendum” Paradigm. *Integr Comp Biol* **19**, 211–224. (doi:10.1093/icb/19.1.211)
- 273 19. Cortemeglia C, Beitinger TL. 2005 Temperature Tolerances of Wild-Type and Red  
274 Transgenic Zebra Danios. *Transactions of the American Fisheries Society* **134**, 1431–1437.  
275 (doi:10.1577/T04-197.1)
- 276 20. Golovanov VK. 2006 The ecological and evolutionary aspects of thermoregulation behavior  
277 on fish. *J. Ichthyol.* **46**, S180–S187. (doi:10.1134/S0032945206110075)
- 278 21. Currie S, Tattersall GJ. 2018 Social cues can push amphibious fish to their thermal limits.  
279 *Biology Letters* **14**, 20180492. (doi:10.1098/rsbl.2018.0492)
- 280 22. Cooper B, Adriaenssens B, Killen SS. 2018 Individual variation in the compromise between  
281 social group membership and exposure to preferred temperatures. *Proceedings of the Royal*  
282 *Society B: Biological Sciences* **285**, 20180884. (doi:10.1098/rspb.2018.0884)
- 283 23. Petersen MF, Steffensen JF. 2003 Preferred temperature of juvenile Atlantic cod *Gadus*  
284 *morhua* with different haemoglobin genotypes at normoxia and moderate hypoxia. *Journal of*  
285 *Experimental Biology* **206**, 359–364. (doi:10.1242/jeb.00111)
- 286 24. Abdallah SJ, Thomas BS, Jonz MG. 2015 Aquatic surface respiration and swimming  
287 behaviour in adult and developing zebrafish exposed to hypoxia. *Journal of Experimental*  
288 *Biology* **218**, 1777–1786. (doi:10.1242/jeb.116343)
- 289 25. Porteus CS, Abdallah SJ, Pollack J, Kumai Y, Kwong RWM, Yew HM, Milsom WK, Perry  
290 SF. 2014 The role of hydrogen sulphide in the control of breathing in hypoxic zebrafish  
291 (*Danio rerio*). *The Journal of Physiology* **592**, 3075–3088.  
292 (doi:10.1113/jphysiol.2014.271098)
- 293 26. Tattersall GJ, Luebbert JP, LePine OK, Ormerod KG, Mercier AJ. 2012 Thermal games in  
294 crayfish depend on establishment of social hierarchies. *Journal of Experimental Biology* **215**,  
295 1892–1904. (doi:10.1242/jeb.065946)

- 296 27. Bürkner P-C. 2017 brms: An R Package for Bayesian Multilevel Models Using Stan. *Journal*  
297 *of Statistical Software* **80**, 1–28. (doi:10.18637/jss.v080.i01)
- 298 28. Gelman A, Rubin DB. 1992 Inference from iterative simulation using multiple sequences.  
299 *Statistical Science* **7**, 457–511.
- 300 29. Reynolds WW, McCauley RW, Casterlin ME, Crawshaw LI. 1976 Body temperatures of  
301 behaviorally thermoregulating largemouth blackbass (*Micropterus salmoides*). *Comparative*  
302 *Biochemistry and Physiology Part A: Physiology* **54**, 461–463. (doi:10.1016/0300-  
303 9629(76)90050-5)
- 304 30. Stevens ED, Fry FEJ. 1974 Heat transfer and body temperatures in non-thermoregulatory  
305 teleosts. *Can. J. Zool.* **52**, 1137–1143. (doi:10.1139/z74-152)
- 306 31. Wood SN. 2017 *Generalized Additive Models: An Introduction with R, Second Edition*. 2nd  
307 edn. Boca Raton, FL: CRC Press. See [https://www.crcpress.com/Generalized-Additive-](https://www.crcpress.com/Generalized-Additive-Models-An-Introduction-with-R-Second-Edition/Wood/p/book/9781498728331)  
308 [Models-An-Introduction-with-R-Second-Edition/Wood/p/book/9781498728331](https://www.crcpress.com/Generalized-Additive-Models-An-Introduction-with-R-Second-Edition/Wood/p/book/9781498728331).
- 309 32. Stoffel MA, Nakagawa S, Schielzeth H. 2017 rptR: repeatability estimation and variance  
310 decomposition by generalized linear mixed-effects models. *Methods in Ecology and*  
311 *Evolution* **8**, 1639–1644. (doi:10.1111/2041-210X.12797)
- 312 33. Kramer DL. 1987 Dissolved oxygen and fish behavior. *Environ Biol Fish* **18**, 81–92.  
313 (doi:10.1007/BF00002597)
- 314 34. Kwiatkoski M, Soriano RN, Francescato HDC, Batalhao ME, Coimbra TM, Carnio EC,  
315 Branco LGS. 2012 Hydrogen sulfide as a cryogenic mediator of hypoxia-induced  
316 anapyrexia. *Neuroscience* **201**, 146–156. (doi:10.1016/j.neuroscience.2011.11.030)
- 317 35. Vámos R. 1964 The Release of Hydrogen Sulphide from Mud. *Journal of Soil Science* **15**,  
318 103–109. (doi:10.1111/j.1365-2389.1964.tb00249.x)
- 319

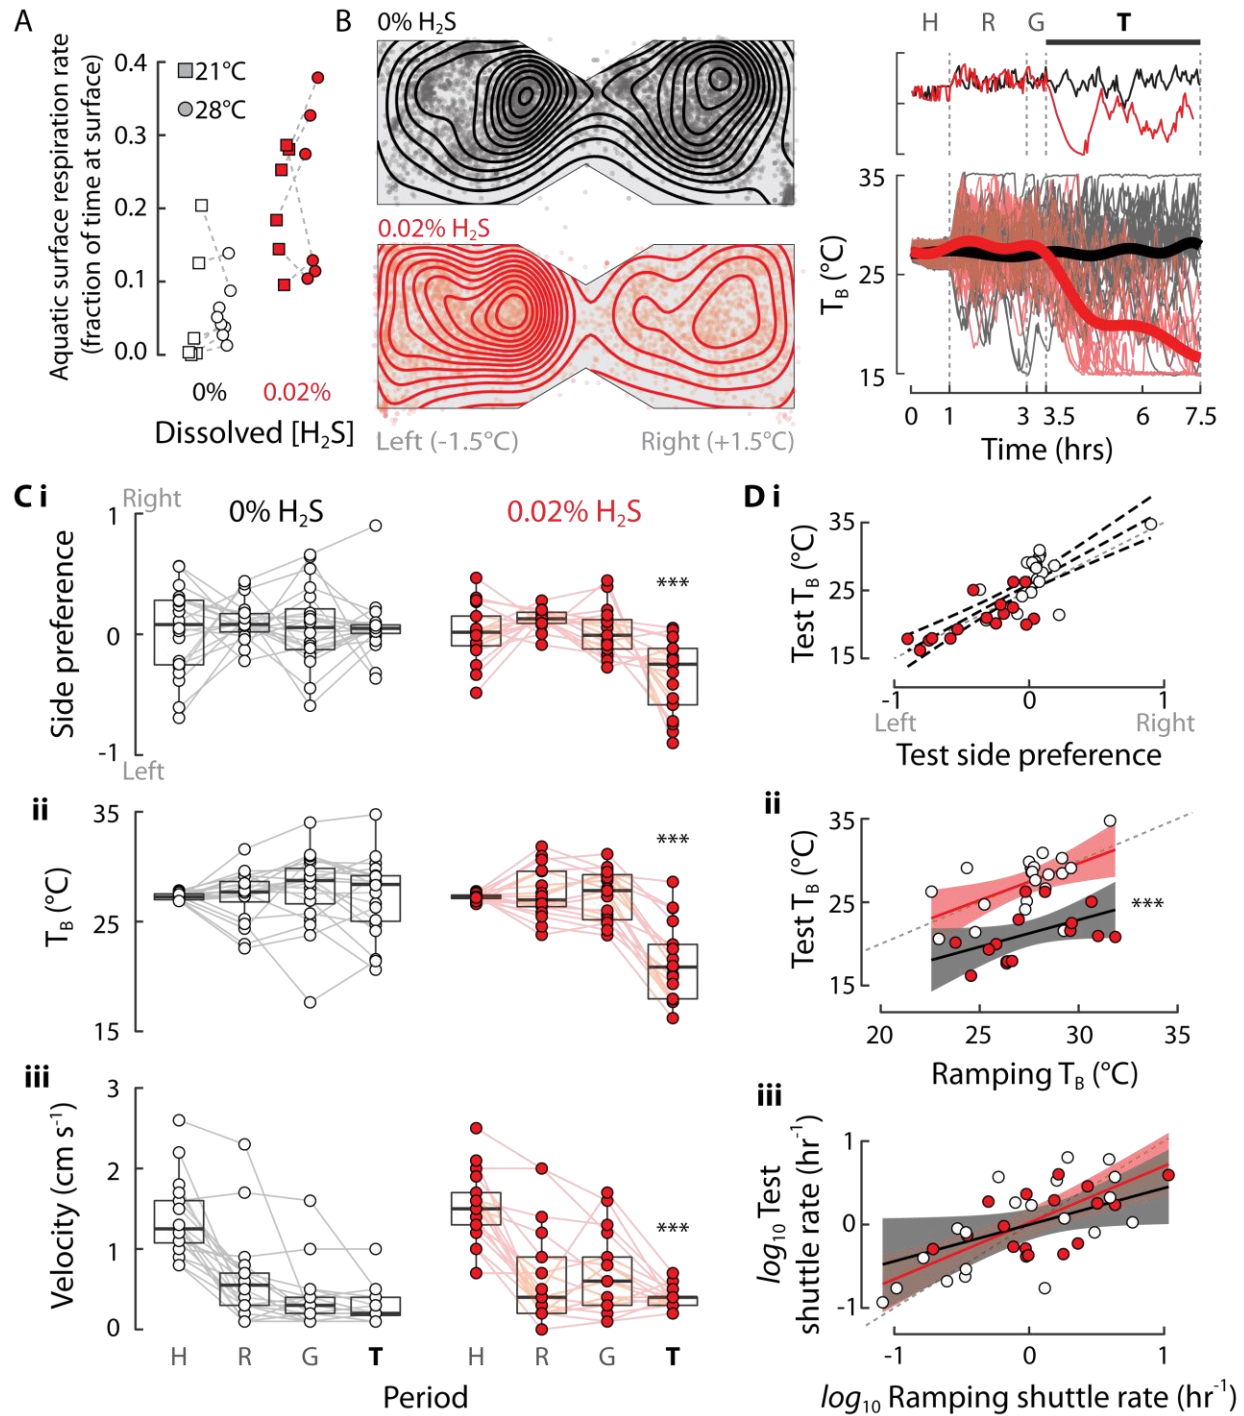

320

321

322 **Figure 1** Hydrogen sulfide ( $H_2S$ ) exposure drives zebrafish behavioural anapyrexia. **A** Adult  
 323 zebrafish exposed to 0.02%  $H_2S$  (red) exhibit greater aquatic surface respiration rates (ASR,  
 324 fraction of time at surface) compared to 0%  $H_2S$ , but this was reduced by lower body  
 325 temperatures,  $T_B$  ( $H_2S$  Credible Intervals, CrI: 1.41–4.36;  $\Delta T_B$  CrI: 0.11–2.43). **B** Adult zebrafish

326 actively defend  $T_B$  by shuttling between chambers of  $3^\circ\text{C}$  difference. Zebrafish habituated (H) to  
327 constant temperature difference over 1 hr, then temperature ramped (R) up or down according to  
328 the selected arm. Following a 30 min gas (G) equilibration phase, testing (T) was performed for  
329 four hours. Two-dimensional kernel density plots of average fish positions (not constrained by  
330 chamber boundaries) reveal fish prefer the cooler chamber (left) with exogenous 0.02%  $\text{H}_2\text{S}$   
331 (red). Minor online tracking errors (points outside boxes) are shown for analytical transparency  
332 but do not affect results. Average body temperature (right, thick lines) is effectively constant at  
333 0%  $\text{H}_2\text{S}$  but rapidly decreases in 0.02%  $\text{H}_2\text{S}$  (thin lines are individual traces). Representative  
334 traces from two individuals (above) demonstrate continuing shuttling behaviour in both  
335 conditions. **C** Measured responses in each time period (B) show the progression of responses  
336 over the course of the experiment, including between ramping and test phases. *i* Significant side  
337 preferences were observed only in 0.02%  $\text{H}_2\text{S}$  (time ratio; 0%  $\text{H}_2\text{S}$  confidence interval, CI: -  
338 0.06–0.18; 0.02%  $\text{H}_2\text{S}$  CI: -0.48– -0.21). *ii* Preferred temperature is significantly lower at 0.02%  
339  $\text{H}_2\text{S}$  ( $p<0.001$ ; CI  $\Delta T_B$ :  $3.6\text{--}8.4^\circ\text{C}$ ). *iii* Fish activity, measured by velocity, declined over time at  
340 0%  $\text{H}_2\text{S}$ , presumably reflecting decreased exploration, but increased with the introduction of  
341  $\text{H}_2\text{S}$ , including during the test phase ( $p<0.001$ ; CI  $\Delta$  velocity:  $0.21\text{--}0.68\text{ cm s}^{-1}$ ). **D** *i*  
342 Interindividual variation in  $T_B$  across treatments was correlated with time spent in each chamber  
343 ( $p=0.001$ ). All individuals must lie on this trend by construction, so treatment effects were  
344 excluded (distinguished by dashed CI band). *ii* Preferred  $T_B$  was repeatable from ramping to test  
345 phases ( $p=0.006$ ) with slope near unity (0.88, CI: 0.24–1.53). A significant effect of 0.02%  $\text{H}_2\text{S}$   
346 without detectable interaction ( $p<0.001$ ; CI  $\Delta T_B$ :  $4.1\text{--}8.3^\circ\text{C}$ ;  $T_B \times \text{H}_2\text{S}$ :  $p=0.61$ ) points to a shift  
347 in  $T_B$  set point. *iii* Shuttle rate was repeatable among individuals ( $p=0.01$ ) but with slope less  
348 than unity (CI: 0.38–0.98), suggesting fish learn to defend  $T_B$  even while expending less effort  
349 (fewer shuttles). The relationship was unaffected by  $\text{H}_2\text{S}$  ( $\text{H}_2\text{S } p=0.85$ ;  $\log$  shuttling rate  $\times \text{H}_2\text{S}$ :  
350  $p=0.37$ ). Sample sizes:  $n$  0%  $\text{H}_2\text{S}=20$ ;  $n$  0.02%  $\text{H}_2\text{S}=17$ .  
351
